# Supplementary material for: Pan-Canadian Electronic Medical Record Diagnostic and Unstructured Text Data for Capturing PTSD: Retrospective Observational Study
Source: PubMed Central journal article supplement (PMC9795397; doi:10.2196/41312), 2022-12-13
Supplement: medinform_v10i12e41312_app1.pdf [file medinform_v10i12e41312_app1.pdf]

Appendix A: Data Extraction Form

| Patient ID number | Patients with True PTSD | Patient Count (number of records) | Explicit PTSD diagnosis (Y/N)? | ≥1 diagnostic criteria of PTSD stated (Y/N)? | diagnosis (key words related to PTSD) | How many criteria does the patient have | Criterion A (Trauma)? | Criterion B (Re-experience)? | Criterion C (Avoidance)? | Criterion D (Distress)? | Criterion E (Hyperarousal)? | Criterion F (Duration > 1 month)? |
|-------------------|-------------------------|-----------------------------------|--------------------------------|----------------------------------------------|---------------------------------------|-----------------------------------------|-----------------------|------------------------------|--------------------------|-------------------------|-----------------------------|-----------------------------------|
|                   |                         |                                   |                                |                                              |                                       |                                         |                       |                              |                          |                         |                             |                                   |
|                   |                         |                                   |                                |                                              |                                       |                                         |                       |                              |                          |                         |                             |                                   |

CONTINUED.

| Criterion G (Functional impairment)? | Criterion H (Symptoms unrelated to medication, drug use, or other illness)? | Symptoms (key words related to recorded symptoms) | Military Family | Veteran | Canadian Forces (Yes, No, Unknown) | Comments |
|--------------------------------------|-----------------------------------------------------------------------------|---------------------------------------------------|-----------------|---------|------------------------------------|----------|
|                                      |                                                                             |                                                   |                 |         |                                    |          |
|                                      |                                                                             |                                                   |                 |         |                                    |          |
|                                      |                                                                             |                                                   |                 |         |                                    |          |
