# Supplementary material for: Pan-Canadian Electronic Medical Record Diagnostic and Unstructured Text Data for Capturing PTSD: Retrospective Observational Study
Source: PubMed Central journal article supplement (PMC9795397; doi:10.2196/41312), 2022-12-13
Supplement: medinform_v10i12e41312_app2.pdf [file medinform_v10i12e41312_app2.pdf]

Appendix B: PTSD terms

| Terms for Case definition 4         |                                                                   |
|-------------------------------------|-------------------------------------------------------------------|
| Inclusion terms                     | Unconfirmed PTSD terms *If present requires second PTSD encounter |
| PTSD                                | ?                                                                 |
| ETAT DE STRESS POST-TRAUMAT         | LIKELY                                                            |
| POST TRAUMATIC STRESS DISORDER      | POSSIBLE                                                          |
| POST TRAUMATIC SD                   | W PTSD FEATURES                                                   |
| POST TRAUMATIC STRESS               | R/O                                                               |
| POST TRAUMATIC STRESS D             | VS                                                                |
| POST TRUAMATIC STRES DISORDER       | CONSULTATION                                                      |
| DESORDRE DE STRESS POST TRAUMATIQUE | ASSESSMENT                                                        |
| DÉSORDRE DE STRESS POST-TRAUMATIQUE | QUESTIONNAIRE: PTSD                                               |
| POST-TRAUMATIC STRESS DISORDER      | POST TRAUMATIC                                                    |
| ÉTAT DE STRESS POST-TRAUMATIQUE     | POST TRAUMATIC FEATURES                                           |
| ÉTAT STRESS POST-TRAUMATIQUE        | POST TRAUMA                                                       |
| POST TRAUMATIC (STRESS DISORDER)    | POST-TRAUMATIC STRESS SYMPTOMS                                    |
| POST*TRAUMATIC STRESS DISORDER      | REMISSION                                                         |
| POSTTRAUM STRESS                    | PREVIOUS PTSD                                                     |
| POST-TRAUMA STRESS DISORDER         | PROBABLE                                                          |
| POSTTRAUMATIC - STRESS DISORDER     | PROBABLY                                                          |
| POST-TRAUMATIC DISORDER             | CHRONIC POST-TRAUMA                                               |
| POSTTRAUMATIC STRESS                | RESOLVED                                                          |
| POST-TRAUMATIC STRESS               | PROVISIONAL                                                       |
| POST-TRAUMATIC STRESS DISORDER      | SELF-REPORTED                                                     |
| POSTTRAUMATIC STRESS DISORDER       | SUSPECTED                                                         |
| PROLONG POSTTRAUM STRESS DISORD     | PAST                                                              |
| PROLONG POSTTRAUM STRESS            | PARTIEL                                                           |
| P.T.S.D.                            |                                                                   |
| STRESS POST-TRAUMATIAQUE            |                                                                   |
| STRESS POST-TRAUMATI                |                                                                   |
| STRESS POST-TRAUMATIQUE             |                                                                   |
| TROUBLE DE STRESS POST TRAUMATIQUE  |                                                                   |
| POSTTRAUMATIC STRES DISORDER        |                                                                   |
